# Supplementary material for: The Potential of Dark Septate Endophytes to Form Root Symbioses with Ectomycorrhizal and Ericoid Mycorrhizal Middle European Forest Plants
Source: PubMed Central journal article supplement (PMC4408093; doi:10.1371/journal.pone.0124752), 2015-04-23
Supplement: pone.0124752.s001.pdf [file pone.0124752.s001.pdf]

# Supplementary Figure 1: The taxonomic position of OTU 1

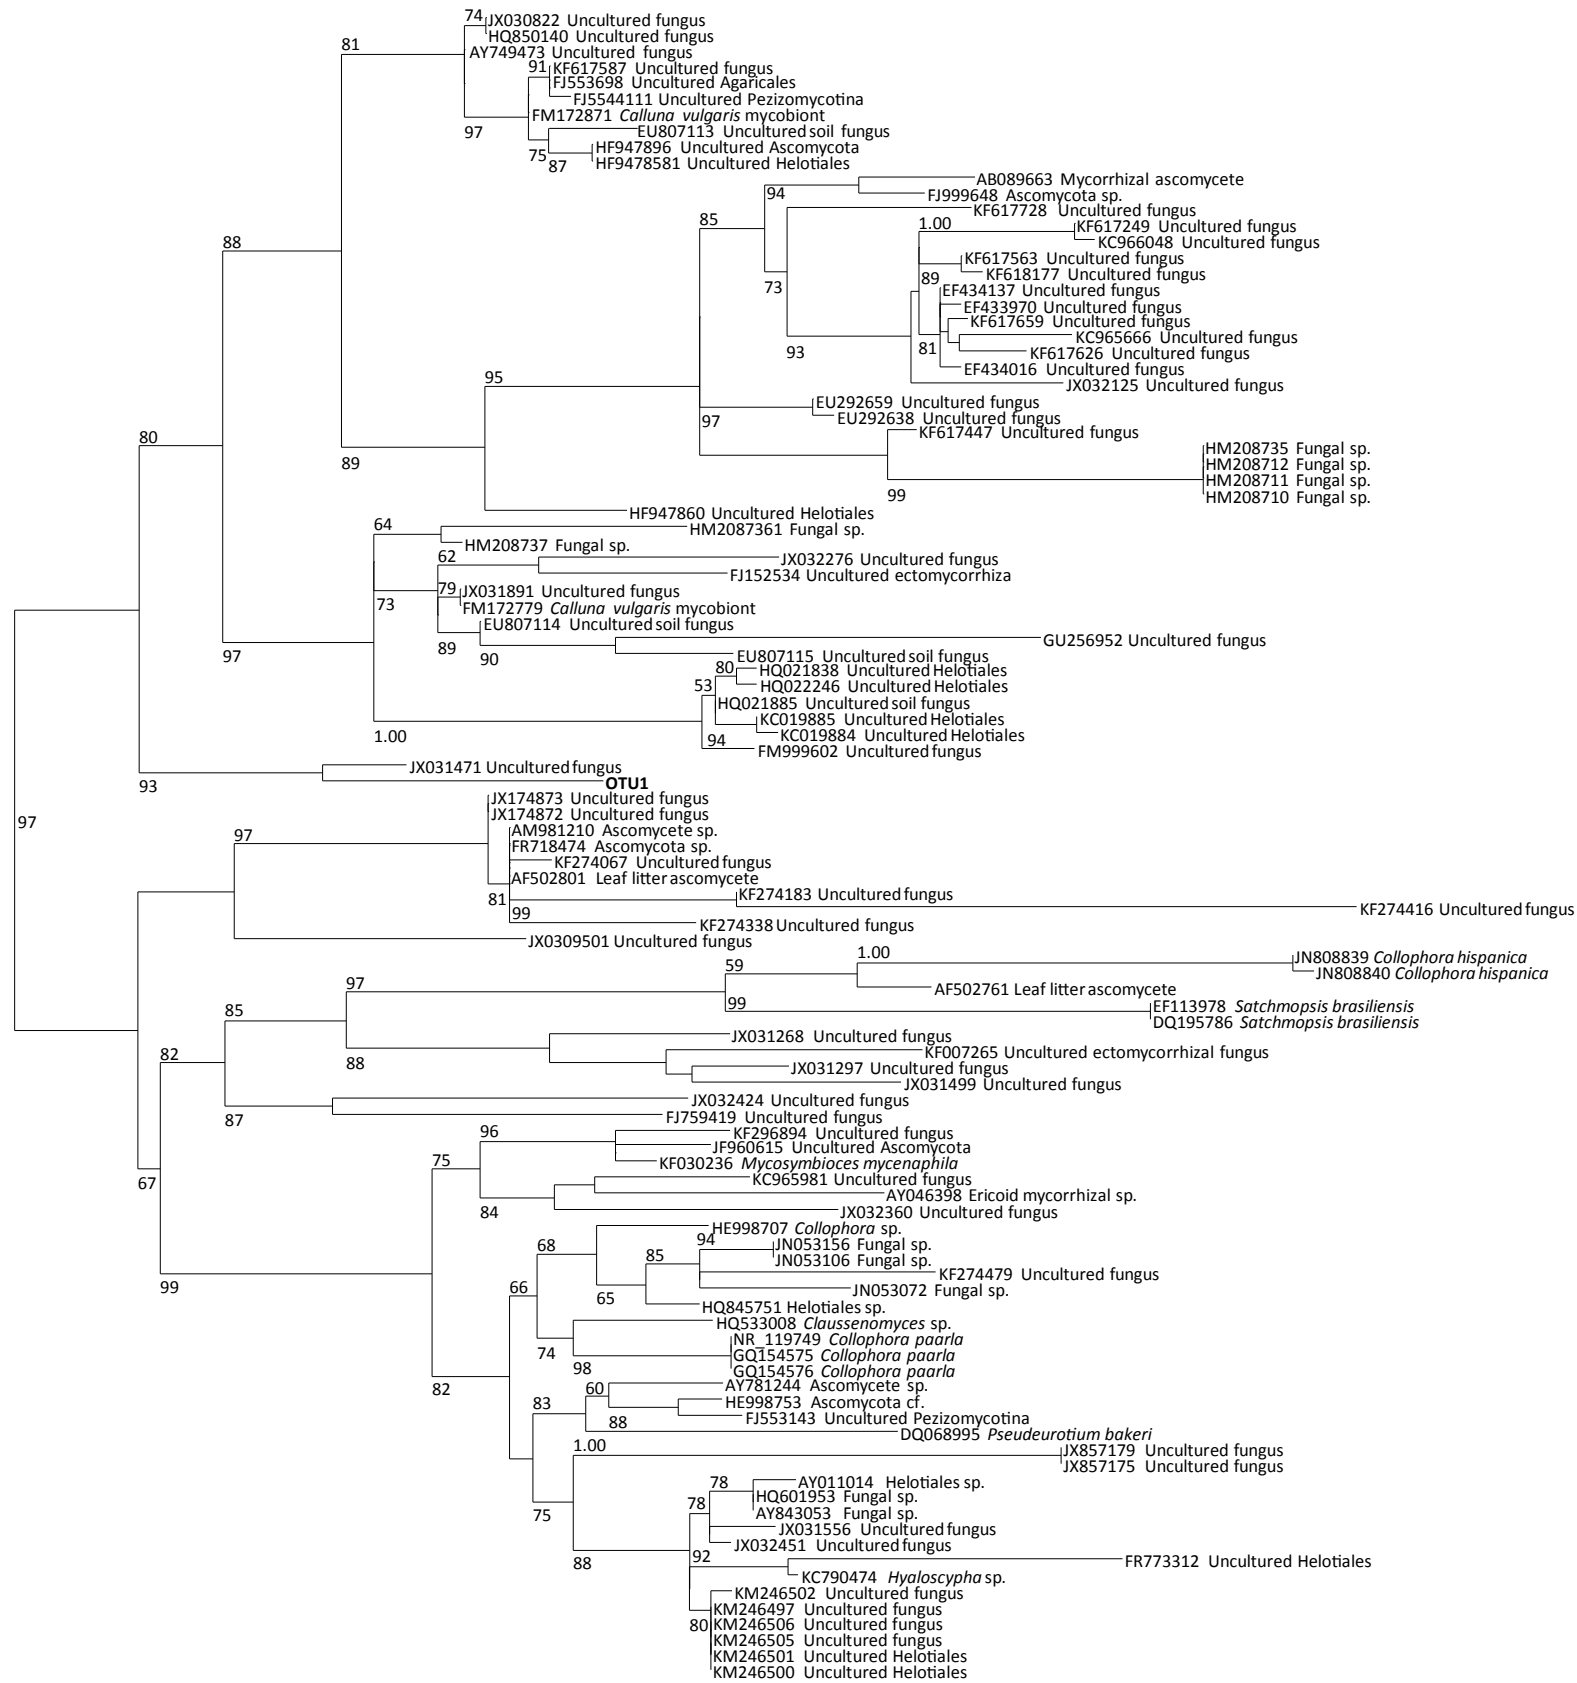

0.5

PhyML ln(L)= -3493.1 166 sites HKY85 4 rate classes
